# Supplementary material for: E1 reaction-induced synthesis of hydrophilic oxide nanoparticles in a non-hydrophilic solvent
Source: Royal Society of Chemistry journal article supplement (doi:10.1039/c2nr32255b), 2012-01-01
Supplement: c2nr32255b.pdf [file c2nr32255b.pdf]

## Supplementary Information

### E1 Reaction-induced Synthesis of Hydrophilic Oxide Nanoparticles in Non-hydrophilic Solvent

Ming-Jun Hu, Jiefeng Gao, Shiliu Yang, Yucheng Dong, Julia Shuk Ping Wong, Jiaju Xu,  
Guangcun Shan, Robert Kwok Yiu Li\*

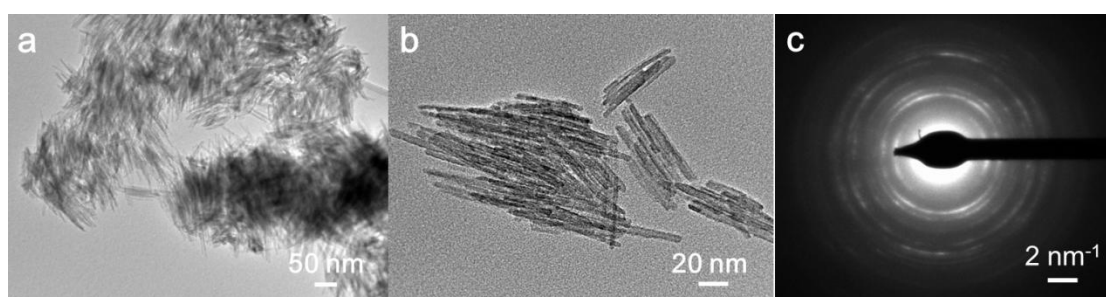

*Fig. S1* a, b) TEM images and c) selected area electron diffraction (SAED) of FeOOH nanoparticles prepared through the reaction between FeCl<sub>3</sub> and tert-amyl alcohol at 80°C.

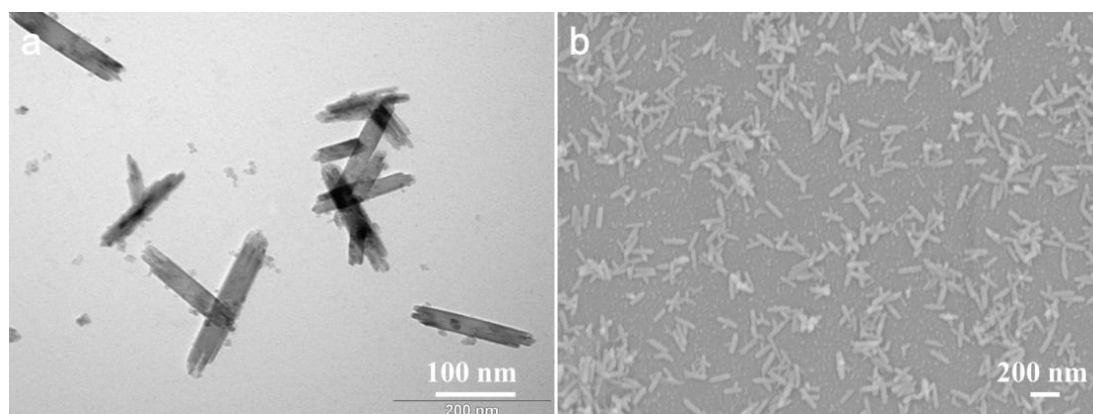

*Fig. S2* a) TEM images and b) SEM images of TiO<sub>2</sub> nanorods prepared in solvothermal process of 100°C through the reaction of tert-amyl alcohol with TiCl<sub>4</sub>.

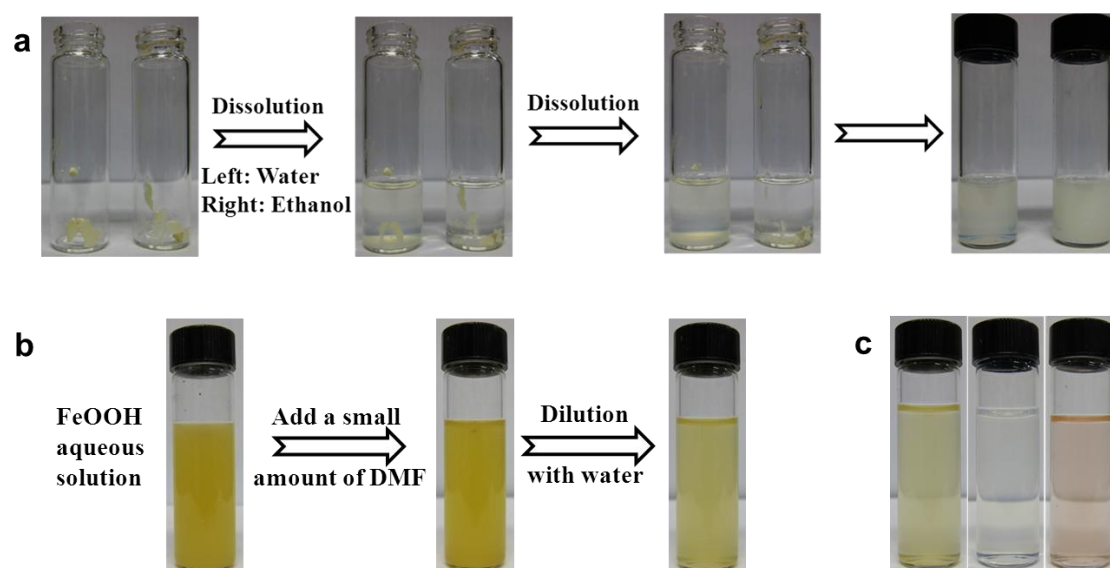

**Fig. S3** a) dissolution process of TiO<sub>2</sub> nanorods in water and ethanol; b) dissolution process of FeOOH nanowires in water with the help of DMF; c) the dispersion of oxides in water with or without the help of a small amount of DMF, and they are FeOOH (water and DMF), TiO<sub>2</sub> (water) and Fe<sub>2</sub>O<sub>3</sub> (water and DMF) from left to right.

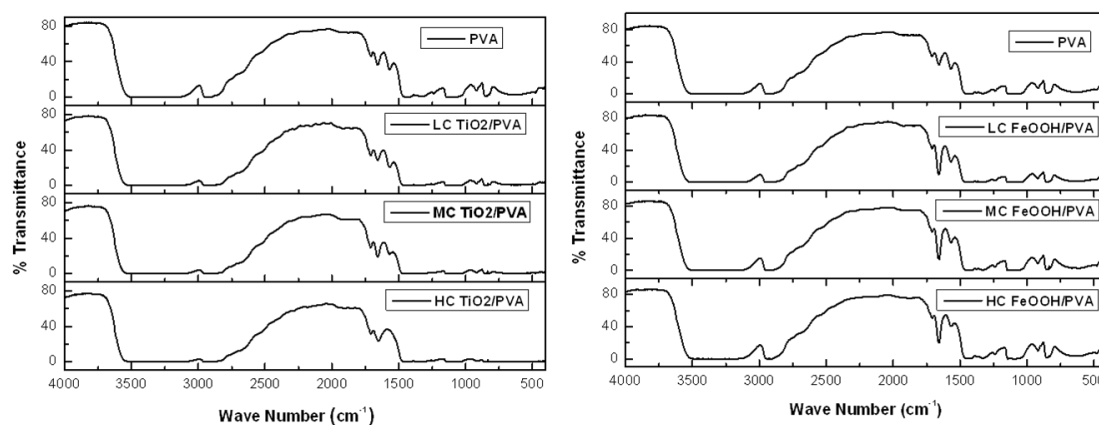

**Fig. S4** FT-IR spectra of TiO<sub>2</sub> PVA composite films with different TiO<sub>2</sub> contents and FeOOH PVA composites with different FeOOH contents.

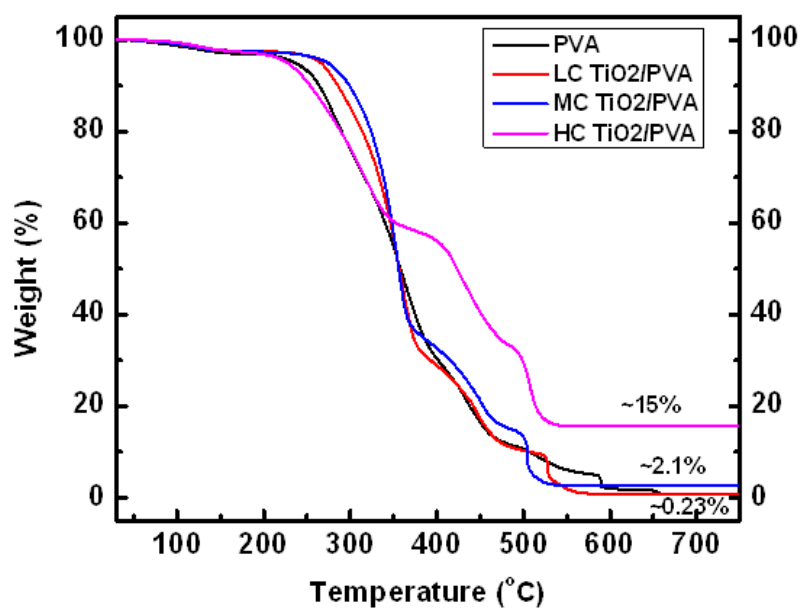

Fig. S5 TGA curves of TiO<sub>2</sub> PVA composites with different TiO<sub>2</sub> contents under atmosphere.

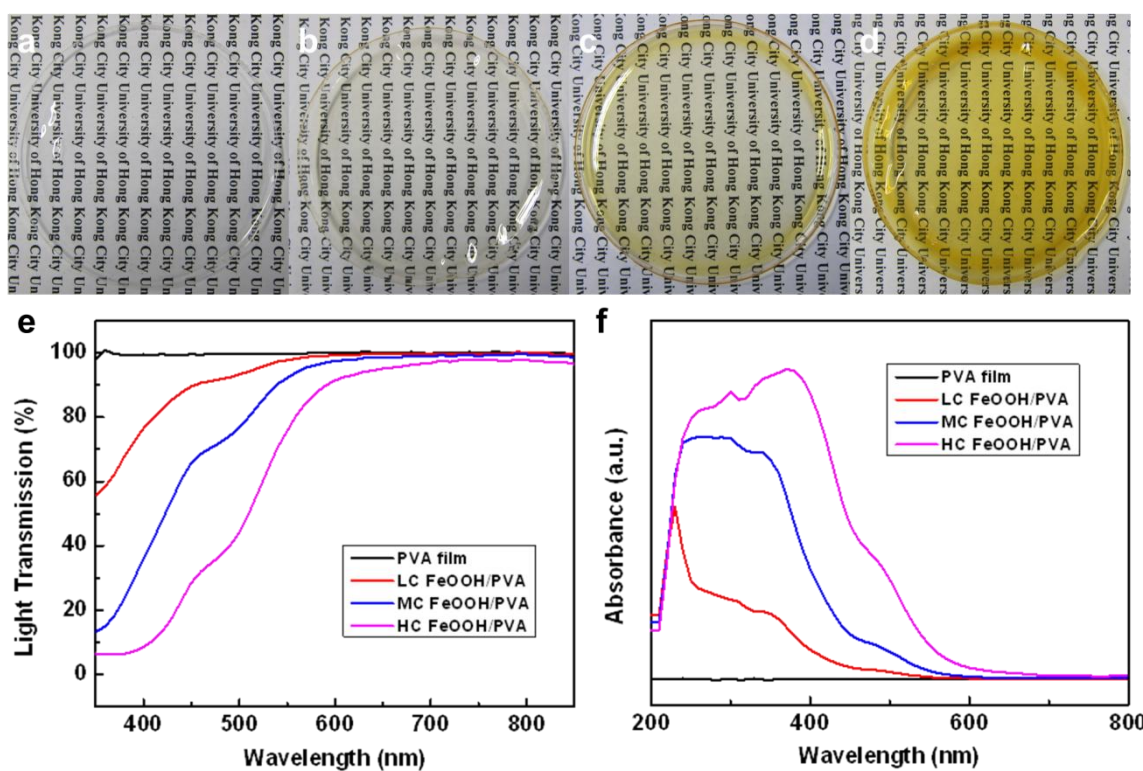

Fig. S6 Light transmission and UV-vis spectrum of FeOOH PVA composite films, showing increasing absorbance of UV-vis light with increasing the content of FeOOH.
